# Supplementary material for: Co-produced capability framework for successful patient and staff partnerships in healthcare quality improvement: results of a scoping review
Source: PubMed Central journal article supplement — BMJ Qual Saf. 2021 Jul 12;31(2):134–46. doi: 10.1136/bmjqs-2020-012729 (PMC8784995; doi:10.1136/bmjqs-2020-012729), 2021-07-12
Supplement: bmjqs-2020-012729supp003.pdf [file bmjqs-2020-012729supp003.pdf]

Appendix C: *Capability framework for successful partnerships in quality improvement with supporting references*

| Domain                     | Capability and description                                                                                                                                                | Patient & healthcare staff references                                                                                                                                                                                                                                                                                                                         | Patient only references                                                                | Healthcare staff only references                                                                                                                            |
|----------------------------|---------------------------------------------------------------------------------------------------------------------------------------------------------------------------|---------------------------------------------------------------------------------------------------------------------------------------------------------------------------------------------------------------------------------------------------------------------------------------------------------------------------------------------------------------|----------------------------------------------------------------------------------------|-------------------------------------------------------------------------------------------------------------------------------------------------------------|
| <b>Personal Attributes</b> | <b>Dedicated to improving healthcare</b><br>1. Motivated to improve patient care and outcomes<br><br>2. Demonstrates ongoing commitment including sustained participation | 1. Blignault et al., 2017; Larkins et al., 2019; Lavoie-Tremblay et al., 2016; Maher et al., 2017a,b; Majid & Gagliardi, 2019; Marshall et al., 2019; Pomey et al., 2016; Pougheon Bertrand et al., 2013; Renado et al., 2015; Worswick et al., 2015<br><br>2. Dimopoulos-Bick et al., 2019; Marshall et al., 2019; Pomey et al., 2015; Worswick et al., 2015 | 1. Kirby et al., 2018; Hertel et al., 2019; Lavoie-Tremblay et al., 2016<br><br>2. Nil | 1. Davis et al., 2016; Fancott et al., 2018; McCarron et al., 2019; Vennik et al., 2016<br><br>2. Bak et al., 2018; Davis et al., 2016; Vennik et al., 2016 |
|                            | <b>Self-aware and reflective</b><br>1. Engages in reflective and reflexive practices that contribute to change for everyone rather than personal interests                | 1. Boivin et al., 2018; Fancott et al., 2018; Kratchman et al., 2015; Kuluski et al., 2019; Maher et al., 2017b; Marshall et al., 2019; Neech et al., 2018; O'Donnell et al., 2019; Pougheon Bertrand et al., 2013; Worswick et al., 2015; Vennik et al., 2016                                                                                                | 1. Pomey et al., 2015; Pomey et al., 2016; Renado et al., 2015                         | 1. Dimopoulos-Bick et al., 2019; Larkins et al., 2019; McGhee & Gleicher, 2018                                                                              |

Appendix C: *Capability framework for successful partnerships in quality improvement with supporting references*

1

| Domain                                 | Capability and description                                                                                                                                                                                                                      | Patient & healthcare staff references                                                                                                                   | Patient only references                                                                                                                                                                                                                                                                                                                                                                                                                   | Healthcare staff only references                      |
|----------------------------------------|-------------------------------------------------------------------------------------------------------------------------------------------------------------------------------------------------------------------------------------------------|---------------------------------------------------------------------------------------------------------------------------------------------------------|-------------------------------------------------------------------------------------------------------------------------------------------------------------------------------------------------------------------------------------------------------------------------------------------------------------------------------------------------------------------------------------------------------------------------------------------|-------------------------------------------------------|
|                                        | 2. In tune with how one's presence, emotional reactions and behaviours influence others                                                                                                                                                         | 2. Kratchman et al., 2015; Kuluski et al., 2019 Maher et al., 2017b; Pougheon Bertrand et al., 2013                                                     | 2. Pomey et al., 2016; Renado et al., 2015                                                                                                                                                                                                                                                                                                                                                                                                | 2. Dimopoulos-Bick et al., 2019; Larkins et al., 2019 |
|                                        | <p><b>Confident and flexible</b></p> <p>1. Confident to actively engage in constructive dialogue in a group setting including patients, public, healthcare staff and leaders</p> <p>2. Flexibly works in unfamiliar and evolving situations</p> | <p>1. Alidina et al., 2019; Blignault et al., 2017; Fancott et al., 2018; Maher et al., 2017a,b</p> <p>2. Alidina et al., 2019; Boivin et al., 2018</p> | <p>1. Caplan et al., 2014; Clavel et al., 2019; Frawley et al., 2019; Holland-Hart et al., 2019; Jenkinson et al., 2014; Lavalley et al., 2019; McCarron et al., 2019; Nathan et al., 2011; Neech et al., 2018; Pomey et al., 2015; Pougheon Bertrand et al., 2013; Renado et al., 2015; Sharma et al., 2016; Shklarov et al., 2017; Vennik et al., 2016; Worswick et al., 2015</p> <p>2. Fancott et al., 2018; Maher et al., 2017a,b</p> | <p>1. Liang et al., 2018</p> <p>2. Nil</p>            |
| <b>Relationships and Communication</b> | <p><b>Working and learning as a team</b></p> <p>1. Works as an effective and active member of a team</p>                                                                                                                                        | 1. Alidina et al., 2019; Bar et al., 2018; Caplan et al., 2014; Clavel et al., 2019; Fancott et al., 2018; Frawley et al., 2019;                        | 1. Holland-Hart et al., 2019                                                                                                                                                                                                                                                                                                                                                                                                              | 1. Holland-Hart et al., 2019                          |

Appendix C: Capability framework for successful partnerships in quality improvement with supporting references

| Domain | Capability and description                                              | Patient & healthcare staff references                                                                                                                                                                                                                                                                                                        | Patient only references | Healthcare staff only references |
|--------|-------------------------------------------------------------------------|----------------------------------------------------------------------------------------------------------------------------------------------------------------------------------------------------------------------------------------------------------------------------------------------------------------------------------------------|-------------------------|----------------------------------|
|        | 2. Recognises the unique and valuable contributions of each team member | Dimopoulos-Bick et al., 2019; Larkins et al., 2019; Lavoie-Tremblay et al., 2016; Loud et al., 2013; Maher et al., 2017a,b; Majid & Gagliardi, 2019; Marshall et al., 2019; Miller at al., 2020; O'Connor et al., 2018; Pougheon Bertrand et al., 2013; Renado et al., 2015; Sharma et al., 2016; Shklarov et al., 2017; Vennik et al., 2016 | 2. Nil                  | 2. Nil                           |
|        | 3. Embraces co-learning                                                 | 2. Boivin et al., 2018; Fancott et al., 2018; Marshall et al., 2019; 2019; Worswick et al., 2015                                                                                                                                                                                                                                             | 3. Nil                  | 3. Nil                           |
|        |                                                                         | 3. Alidina et al., 2019; Boivin et al., 2018; Fancott et al., 2018; Kuluski et al., 2019; Larkins et al., 2019; Majid & Gagliardi, 2019; Miller at al., 2020; O'Donnell et al., 2019; Pomey et al., 2016; Pougheon Bertrand et al., 2013; Renado et al., 2015; Shklarov et al., 2017; Worswick et al., 2015                                  |                         |                                  |

Appendix C: Capability framework for successful partnerships in quality improvement with supporting references

| Domain | Capability and description                                                                       | Patient & healthcare staff references                                                                                                                                                                                                                                                                                                                                                                                                                                                                                                                                                                                                                                                                                          | Patient only references          | Healthcare staff only references                                       |
|--------|--------------------------------------------------------------------------------------------------|--------------------------------------------------------------------------------------------------------------------------------------------------------------------------------------------------------------------------------------------------------------------------------------------------------------------------------------------------------------------------------------------------------------------------------------------------------------------------------------------------------------------------------------------------------------------------------------------------------------------------------------------------------------------------------------------------------------------------------|----------------------------------|------------------------------------------------------------------------|
|        | <p><b>Collaborating and communicating</b></p> <p>1. Works collaboratively to build consensus</p> | <p>1. Alidina et al., 2019; Bak et al., 2018; Bar et al., 2018; Blignault et al., 2017; Bombard et al., 2018; Boivin et al., 2018; Dimopoulos-Bick et al., 2019; Fancott et al., 2018; Hertel et al., 2019; Jenkinson et al., 2014; Kirby et al., 2018; Lavoie-Tremblay et al., 2016; Larkins et al., 2019; Kuluski et al., 2019; Loud et al., 2013; Maher et al., 2017a,b; Majid &amp; Gagliardi, 2019; Marshall et al., 2019; Miller et al., 2020; Nathan et al., 2010; Neech et al., 2018; O'Connor et al., 2018; Pomey et al., 2016; Pomey et al., 2015; Pougheon Bertrand et al., 2013; Renado et al., 2015; Scholz et al., 2017; Sharma et al., 2016; Singh et al., 2018; Vennik et al., 2016; Worswick et al., 2015</p> | <p>1. Jenkinson et al., 2014</p> | <p>1. Bak et al., 2014; Scholz et al., 2017; Shklarov et al., 2017</p> |

Appendix C: Capability framework for successful partnerships in quality improvement with supporting references

| Domain | Capability and description                                            | Patient & healthcare staff references                                                                                                                                                                                                                                                                                                                                                                                                                                                                                                   | Patient only references                            | Healthcare staff only references                                                                           |
|--------|-----------------------------------------------------------------------|-----------------------------------------------------------------------------------------------------------------------------------------------------------------------------------------------------------------------------------------------------------------------------------------------------------------------------------------------------------------------------------------------------------------------------------------------------------------------------------------------------------------------------------------|----------------------------------------------------|------------------------------------------------------------------------------------------------------------|
|        | 2. Demonstrates strong conflict resolution and negotiation skills     | 2. Blignault et al., 2017; Boivin et al., 2018; Dimopoulos-Bick et al., 2019; Frawley et al., 2019; Jenkinson et al., 2014; Kuluski et al., 2019; Sharma et al., 2016                                                                                                                                                                                                                                                                                                                                                                   | 2. Nil                                             | 2. Liang et al., 2018; Nathan et al., 2010; Pougheon Bertrand et al., 2013; Shklarov et al., 2017          |
|        | 3. Builds respectful, constructive and reciprocal relationships       | 3. Alidina et al., 2019; Bak et al., 2018; Bar et al., 2018; Boivin et al., 2018; Bombard et al., 2018; Dimopoulos-Bick et al., 2019; Fancott et al., 2018; Frawley et al., 2019; Jenkinson et al., 2014; Kratchman et al., 2015; Kuluski et al., 2019; Lavoie-Tremblay et al., 2016; Larkins et al., 2019; Majid & Gagliardi, 2019; Marshall et al., 2019; Nathan et al., 2010; O'Connor et al., 2018; O'Donnell et al., 2019; Pomey et al., 2016; Renado et al., 2015; Sharma et al., 2016; Singh et al., 2018; Worswick et al., 2015 | 3. Nil                                             | 3. Bak et al., 2014; Blignault et al., 2017; Hertel et al., 2019; Maher et al., 2017b; Scholz et al., 2017 |
|        | <b>Advocating for everyone</b><br>1. Influences change to improve PPI | 1. Bar et al., 2018; Boivin et al., 2018; Dimopoulos-Bick                                                                                                                                                                                                                                                                                                                                                                                                                                                                               | 1. Blignault et al., 2017; Dimopoulos-Bick et al., | 1. Bombard et al., 2018; Clavel et al., 2019;                                                              |

Appendix C: Capability framework for successful partnerships in quality improvement with supporting references

| Domain | Capability and description                                                                                                   | Patient & healthcare staff references                                                                                                                                                                                                                                                                                                                                                                                                                                                                                                                                                                                                                                                                | Patient only references                                                                                                                                                                | Healthcare staff only references                                                                                                                                                                                                                                                                                                                                                                                                                                                                                              |
|--------|------------------------------------------------------------------------------------------------------------------------------|------------------------------------------------------------------------------------------------------------------------------------------------------------------------------------------------------------------------------------------------------------------------------------------------------------------------------------------------------------------------------------------------------------------------------------------------------------------------------------------------------------------------------------------------------------------------------------------------------------------------------------------------------------------------------------------------------|----------------------------------------------------------------------------------------------------------------------------------------------------------------------------------------|-------------------------------------------------------------------------------------------------------------------------------------------------------------------------------------------------------------------------------------------------------------------------------------------------------------------------------------------------------------------------------------------------------------------------------------------------------------------------------------------------------------------------------|
|        | <p>2. Promotes the needs of marginalised populations</p> <p>3. Shares successes, networks and links diverse stakeholders</p> | <p>et al., 2019; Fancott et al., 2018; Jenkinson et al., 2014; Kuluski et al., 2019; Lavoie-Tremblay et al., 2016; Maher et al, 2017a,b; Rise et al., 2014</p> <p>2. Bar et al., 2018; Boivin et al., 2018; Nathan et al., 2010; Neech et al., 2018; Sharma et al., 2016; Shklarov et al., 2017; Vennik et al., 2016</p> <p>3. Alidina et al., 2019; Bak et al., 2018; Bar et al., 2018; Blignault et al., 2017; Boivin et al., 2018; Fancott et al., 2018; Frawley et al., 2019; Jenkinson et al., 2014; Larkins et al., 2019; Loud et al., 2013; Marshall et al., 2019; Nathan et al., 2010; Neech et al., 2018; O'Connor et al., 2018; O'Donnell et al., 2019; Pougheon Bertrand et al., 2013</p> | <p>2019; Nathan et al., 2010; Neech et al., 2018; O'Connor et al., 2018; Scholz et al., 2017; Sharma et al., 2016; Vennik et al., 2016</p> <p>2. Scholz et al., 2017</p> <p>3. Nil</p> | <p>Holland-Hart et al., 2019; Liang et al., 2018; Marshall et al., 2019; O'Donnell et al., 2019</p> <p>2. Alidina et al., 2019; Blignault et al., 2017; Davis et al., 2016; Dimopoulos-Bick et al., 2019; Hertel et al., 2019; Holland-Hart et al., 2019; Hwang and Warshaw., 2019; Jenkinson et al., 2014; Kuluski et al., 2019; Larkins et al., 2019; Maher et al, 2017b</p> <p>3. Bombard et al., 2018; Caplan et al., 2014; Clavel et al., 2019; Holland-Hart et al., 2019; Liang et al., 2018; Maher et al., 2017a,b</p> |

| Domain                                    | Capability and description                                                                 | Patient & healthcare staff references                                                                                                                                                                                                                                                                                                                                                                                                                | Patient only references | Healthcare staff only references                                                                                                                                                                                                                                            |
|-------------------------------------------|--------------------------------------------------------------------------------------------|------------------------------------------------------------------------------------------------------------------------------------------------------------------------------------------------------------------------------------------------------------------------------------------------------------------------------------------------------------------------------------------------------------------------------------------------------|-------------------------|-----------------------------------------------------------------------------------------------------------------------------------------------------------------------------------------------------------------------------------------------------------------------------|
| <b>Philosophies, Models and Practices</b> | 1. Works within organisational priorities, governance, policies, resources and constraints | 1. Alidina et al., 2019; Bak et al., 2014; Blignault et al., 2017; Frawley et al., 2019; Hertel et al., 2019; Jenkinson et al., 2014; Kuluski et al., 2019; Lavoie-Tremblay et al., 2016; Loud et al., 2013; Maher et al., 2017a,b; Majid & Gagliardi, 2019; Marshall et al., 2019; Miller et al., 2020; O'Donnell et al., 2019; Pomey et al., 2016; Pougheon Bertrand et al., 2013; Renado et al., 2015; Scholz et al., 2017; Worswick et al., 2015 | 1. Frawley et al., 2019 | 1. Bar et al., 2018; Bombard et al., 2018; Caplan et al., 2014; Clavel et al., 2019; Davis et al., 2016; Liang et al., 2018; McGhee & Gleicher, 2018; O'Connor et al., 2018; Rise et al., 2014; Sharma et al., 2016; Shklarov et al., 2017; Vennik et al., 2016             |
|                                           | 2. Develops sustainable solutions that fit the context                                     | 2. Blignault et al., 2017; Boivin et al., 2018; Dimopoulos-Bick et al., 2019; Frawley et al., 2019; Lavoie-Tremblay et al., 2016; Maher et al., 2017a,b; Marshall et al., 2019; Majid & Gagliardi, 2019; Miller et al., 2020; O'Donnell et al., 2019; Pomey et al., 2016; Pougheon Bertrand et                                                                                                                                                       | 2. Frawley et al., 2019 | 2. Alidina et al., 2019; Bak et al., 2014; Bak et al., 2018, Bar et al., 2018; Bombard et al., 2018; Caplan et al., 2014; Clavel et al., 2019; Davis et al., 2016; Liang et al., 2018; McGhee & Gleicher, 2018; Pomey et al., 2015; Rise et al., 2014; Sharma et al., 2016; |

Appendix C: Capability framework for successful partnerships in quality improvement with supporting references

| Domain | Capability and description                                                                       | Patient & healthcare staff references                                                                                                                                                                                                                | Patient only references                                                                                                                                                                                                                                                                         | Healthcare staff only references                                                                                                                                                                                                                                                                                                                                                            |
|--------|--------------------------------------------------------------------------------------------------|------------------------------------------------------------------------------------------------------------------------------------------------------------------------------------------------------------------------------------------------------|-------------------------------------------------------------------------------------------------------------------------------------------------------------------------------------------------------------------------------------------------------------------------------------------------|---------------------------------------------------------------------------------------------------------------------------------------------------------------------------------------------------------------------------------------------------------------------------------------------------------------------------------------------------------------------------------------------|
|        | 3. Demonstrates awareness of relevant clinical processes and has sufficient health literacy      | al., 2013; Renado et al., 2015; Sharma et al., 2016; Worswick et al., 2015<br>3. Dimopoulos-Bick et al., 2019; Hertel et al., 2019                                                                                                                   | 3. Caplan et al., 2014; Holland-Hart et al., 2019; Jenkinson et al., 2014; Kirby et al., 2018; Kuluski et al., 2019; Lavoie-Tremblay et al., 2016; Loud et al., 2013; Maher et al., 2017a,b; Majid & Gagliardi, 2019; Pomey et al., 2015; Pougheon Bertrand et al., 2013; Worswick et al., 2015 | Shklarov et al., 2017; Vennik et al., 2016<br>3. Bombard et al., 2018                                                                                                                                                                                                                                                                                                                       |
|        | <b>Patient and public involvement best practice</b><br>1. Committed to the inherent value of PPI | 1. Caplan et al., 2014; Holland-Hart et al., 2019; Maher et al., 2017a,b; Majid & Gagliardi, 2019; Marshall et al., 2019; Neech et al., 2018; O'Connor et al., 2018; Pomey et al., 2016; Renado et al., 2015; Rise et al., 2014; Scholz et al., 2017 | 1. Nil                                                                                                                                                                                                                                                                                          | 1. Alidina et al., 2019; Bak et al., 2018; Bar et al., 2018; Blignault et al., 2017; Boivin et al., 2018; Bombard et al., 2018; Davis et al., 2016; Dimopoulos-Bick et al., 2019; Fancott et al., 2018; Farrington et al., 2016; Hertel et al., 2019; Jenkinson et al., 2014; Kuluski et al., 2019; Larkins et al., 2019; Lavalley et al., 2019; Liang et al., 2018; McCarron et al., 2019; |

Appendix C: Capability framework for successful partnerships in quality improvement with supporting references

| Domain | Capability and description                              | Patient & healthcare staff references                                                                                                                                                                                                                                                                                                                                                                                                                                                                                                                  | Patient only references | Healthcare staff only references                                                                                                                                                                                                                                                                                                                                                                                                                                                                                                                                                                                                                                                                               |
|--------|---------------------------------------------------------|--------------------------------------------------------------------------------------------------------------------------------------------------------------------------------------------------------------------------------------------------------------------------------------------------------------------------------------------------------------------------------------------------------------------------------------------------------------------------------------------------------------------------------------------------------|-------------------------|----------------------------------------------------------------------------------------------------------------------------------------------------------------------------------------------------------------------------------------------------------------------------------------------------------------------------------------------------------------------------------------------------------------------------------------------------------------------------------------------------------------------------------------------------------------------------------------------------------------------------------------------------------------------------------------------------------------|
|        | 2. Implements a variety of PPI principles and practices | 2. Bak et al., 2014; Clavel et al., 2019; Bak et al., 2018; Bar et al., 2018; Boivin et al., 2018; Bombard et al., 2018; Clavel et al., 2019; Dimopoulos-Bick et al., 2019; Frawley et al., 2019; Hertel et al., 2019; Holland-Hart et al., 2019; Hwang and Warshaw, 2019; Loud et al., 2013; Maher et al., 2017a,b; Majid & Gagliardi, 2019; Marshall et al., 2019; Miller et al., 2020; Nathan et al., 2010; Neech et al., 2018; Pomey et al., 2016; Renado et al., 2015; Rise et al., 2014; Scholz et al., 2017; Sharma et al., 2016; Singh et al., | 2. Nil                  | McGhee & Gleicher, 2018; Miller et al., 2020; Nathan et al., 2010; O'Donnell et al., 2019; Pandhi et al., 2020; Pomey et al., 2015; Pougheon Bertrand et al., 2013; Sharma et al., 2016; Shklarov et al., 2017; Singh et al., 2018; Vennik et al., 2016<br>2. Alidina et al., 2019; Bak et al., 2018; Bar et al., 2018; Blignault et al., 2017; Boivin et al., 2018; Bombard et al., 2018; Caplan et al., 2014; Davis et al., 2016; Dimopoulos-Bick et al., 2019; Fancott et al., 2018; Jenkinson et al., 2014; Kirby et al., 2018; Kuluski et al., 2019; Larkins et al., 2019; Lavalle et al., 2019; Liang et al., 2018; O'Donnell et al., 2019; Pandhi et al., 2020; Pomey et al., 2016; Vennik et al., 2016 |

Appendix C: Capability framework for successful partnerships in quality improvement with supporting references

| Domain | Capability and description                                          | Patient & healthcare staff references                                                                                                                                                                                                                                 | Patient only references                                                                                                                                                                                                                                                                                       | Healthcare staff only references                                                                                                                                                                                                                                                                                                                                                                                    |
|--------|---------------------------------------------------------------------|-----------------------------------------------------------------------------------------------------------------------------------------------------------------------------------------------------------------------------------------------------------------------|---------------------------------------------------------------------------------------------------------------------------------------------------------------------------------------------------------------------------------------------------------------------------------------------------------------|---------------------------------------------------------------------------------------------------------------------------------------------------------------------------------------------------------------------------------------------------------------------------------------------------------------------------------------------------------------------------------------------------------------------|
|        | 3. Effectively conveys own experiences to influence and persuade    | 2018; Worswick et al., 2015<br>3. Kuluski et al., 2019; Maher et al., 2017a.b; McGhee & Gleicher, 2018; Miller et al., 2020; O'Donnell et al., 2019; Worswick et al., 2015                                                                                            | 3. Bak et al., 2018; Bar et al., 2018; Blignault et al., 2017; Caplan et al., 2014; Dimopoulos-Bick et al., 2019; Frawley et al., 2019; Hertel et al., 2019; Kratchman et al., 2015; Lavoie-Tremblay et al., 2016; Liang et al., 2018; Pougheon Bertrand et al., 2013; Rise et al., 2014; Vennik et al., 2016 | 3. Clavel et al., 2019; Nathan et al., 2010                                                                                                                                                                                                                                                                                                                                                                         |
|        | 4. Facilitates teaching and learning including mentoring / coaching | 4. Bak et al., 2014; Blignault et al., 2017; Clavel et al., 2019; Lavalley et al., 2019; Loud et al., 2013; Majid & Gagliardi, 2019; Miller et al., 2020; O'Donnell et al., 2019; Scholz et al., 2017; Singh et al., 2018; Vennik et al., 2016; Worswick et al., 2015 | 4. Kratchman et al., 2015; Neech et al., 2018                                                                                                                                                                                                                                                                 | 4. Alidina et al., 2019; Caplan et al., 2014; Dimopoulos-Bick et al., 2019; Fancott et al., 2018; Frawley et al., 2019; Hertel et al., 2019; Jenkinson et al., 2014; Larkins et al., 2019; Maher et al., 2017a; McCarron et al., 2019; McGhee & Gleicher, 2018; Nathan et al., 2010; Pandhi et al., 2020; Pomey et al., 2015; Pomey et al., 2016; Sharma et al., 2016; Shklarov et al., 2017; Worswick et al., 2015 |
|        | 5. Provides ongoing support and feedback to patient partners        | 5. Kratchman et al., 2015                                                                                                                                                                                                                                             | 5. Nil                                                                                                                                                                                                                                                                                                        | 5. Bak et al., 2014; Boivin et al., 2018; Bombard et al.,                                                                                                                                                                                                                                                                                                                                                           |

Appendix C: Capability framework for successful partnerships in quality improvement with supporting references

| Domain | Capability and description                                                                                                                                              | Patient & healthcare staff references                                                                                                                                                                                                                                                                                                                                                                                         | Patient only references   | Healthcare staff only references                                                                                                                                                                                                                                                                                                           |
|--------|-------------------------------------------------------------------------------------------------------------------------------------------------------------------------|-------------------------------------------------------------------------------------------------------------------------------------------------------------------------------------------------------------------------------------------------------------------------------------------------------------------------------------------------------------------------------------------------------------------------------|---------------------------|--------------------------------------------------------------------------------------------------------------------------------------------------------------------------------------------------------------------------------------------------------------------------------------------------------------------------------------------|
|        |                                                                                                                                                                         |                                                                                                                                                                                                                                                                                                                                                                                                                               |                           | 2018; Clavel et al., 2019; Dimopoulos-Bick et al., 2019; Fancott et al., 2018; Lavoie-Tremblay et al., 2016; Liang et al., 2018; Loud et al., 2013; Majid & Gagliardi, 2019; Maher et al., 2017b; McCarron et al. 2019; Nathan et al., 2010; Neech et al., 2018; Pomey et al., 2016; Pougheon Bertrand et al., 2013; Worswick et al., 2015 |
|        | <b>Quality improvement principles and processes</b><br>1. Implements appropriate quality improvement processes across service planning, design, delivery and evaluation | 1. Alidina et al., 2019; Bak et al., 2018; Bar et al., 2018; Dimopoulos-Bick et al., 2019; Fancott et al., 2018; Frawley et al., 2019; Jenkinson et al., 2014; Kirby et al., 2018; Lavalle et al., 2019; Loud et al., 2013; Lavoie-Tremblay et al., 2016; Maher et al., 2017a,b; Miller et al., 2020; O'Connor et al., 2018; O'Donnell et al., 2019; Pomey et al., 2016; Pougheon Bertrand et al., 2013; Renado et al., 2015; | 1. Blignault et al., 2017 | 1. Boivin et al., 2018; Caplan et al., 2014; Davis et al., 2016; Kuluski et al. 2019; Larkins et al., 2019; Marshall et al., 2019; McGhee & Gleicher, 2018; Pandhi et al., 2020; Vennik et al., 2016                                                                                                                                       |

Appendix C: Capability framework for successful partnerships in quality improvement with supporting references

| Domain                    | Capability and description                                                                                                                                       | Patient & healthcare staff references                                                                                                                                                                                                                                                                                                                                                                                                                                                                                                                                                                                                                                         | Patient only references                      | Healthcare staff only references                                                                                                                                                                                                          |
|---------------------------|------------------------------------------------------------------------------------------------------------------------------------------------------------------|-------------------------------------------------------------------------------------------------------------------------------------------------------------------------------------------------------------------------------------------------------------------------------------------------------------------------------------------------------------------------------------------------------------------------------------------------------------------------------------------------------------------------------------------------------------------------------------------------------------------------------------------------------------------------------|----------------------------------------------|-------------------------------------------------------------------------------------------------------------------------------------------------------------------------------------------------------------------------------------------|
|                           |                                                                                                                                                                  | Sharma et al., 2016; Shklarov et al., 2017; Singh et al., 2018; Worswick et al., 2015                                                                                                                                                                                                                                                                                                                                                                                                                                                                                                                                                                                         |                                              |                                                                                                                                                                                                                                           |
| <b>Across all Domains</b> | <p><b>Sharing power and leadership</b></p> <p>1. Contributes to transforming traditional power dynamics</p> <p>2. Actively encourages shared decision making</p> | <p>1. Bombard et al., 2018; Dimopoulos-Bick et al., 2019; Fancott et al., 2018; Holland-Hart et al., 2019; Lavoie-Tremblay et al., 2016; Majid &amp; Gagliardi, 2019; Pomey et al., 2016; Renado et al., 2015; Scholz et al., 2017; Worswick et al., 2015</p> <p>2. Blignault et al., 2017; Bombard et al., 2018; Dimopoulos-Bick et al., 2019; Fancott et al., 2018; Hertel et al., 2019; Holland-Hart et al., 2019; Lavoie-Tremblay et al., 2016; Majid &amp; Gagliardi, 2019; Marshall et al., 2019; O'Connor et al., 2018; Pomey et al., 2016; Pougheon Bertrand et al., 2013; Renado et al., 2015; Sharma et al., 2016; Shklarov et al., 2017; Worswick et al., 2015</p> | <p>1. Alidina et al., 2019</p> <p>2. Nil</p> | <p>1. Boivin et al., 2018; Kuluski et al., 2019; Nathan et al., 2010; Neech et al., 2018; O'Donnell et al., 2019</p> <p>2. Boivin et al., 2018; Larkins et al., 2019; Nathan et al., 2010; Neech et al., 2018; O'Donnell et al., 2019</p> |

Appendix C: Capability framework for successful partnerships in quality improvement with supporting references

| <b>Domain</b> | <b>Capability and description</b>         | <b>Patient &amp; healthcare staff references</b>                                                                                         | <b>Patient only references</b> | <b>Healthcare staff only references</b> |
|---------------|-------------------------------------------|------------------------------------------------------------------------------------------------------------------------------------------|--------------------------------|-----------------------------------------|
|               | 3. Supports patient-led leadership models | 3. Blignault et al., 2017; Frawley et al., 2019; Lavalle et al., 2019; McGhee & Gleicher, 2018; Scholz et al., 2017; Sharma et al., 2016 | 3. Nil                         | 3. Larkins et al., 2019                 |
